# Supplementary material for: Delineating spatiotemporal and hierarchical development of human fetal innate lymphoid cells
Source: PubMed Central journal article supplement (PMC8486758; doi:10.1038/s41422-021-00529-2), 2021-07-08
Supplement: 41422_2021_529_MOESM1_ESM.pdf [file 41422_2021_529_MOESM1_ESM.pdf]

Figure S1

| Sample | Stage  | Gender | Tissue    | Cell hashing with single-cell RNA sequencing<br>10x Genomics                                                     |                             |
|--------|--------|--------|-----------|------------------------------------------------------------------------------------------------------------------|-----------------------------|
|        |        |        |           | Gating strategy                                                                                                  | No. Hashtag<br>(Total seqB) |
| F1     | 8 PCW  | Male   | Lung      | P1: Lin <sup>-</sup> CD45 <sup>+</sup> CD127 <sup>+</sup> CD34 <sup>-</sup> (ILC, 70%)                           | 1                           |
|        |        |        | Intestine | P2: Lin <sup>-</sup> CD45 <sup>+</sup> CD34 <sup>+</sup> CD127 <sup>+</sup> (Lymphoid progenitor,10%)            | 2                           |
|        |        |        | Liver     | P3: Lin <sup>-</sup> CD45 <sup>+</sup> CD34 <sup>+</sup> CD127 <sup>-</sup> (Other HSPC, 10%)                    | 3                           |
|        |        |        | Skin      | P4: Lin <sup>-</sup> CD45 <sup>+</sup> CD127 <sup>-</sup> CD34 <sup>-</sup> (Other lin, 10%)                     | 4                           |
| F2     | 8 PCW  | Female | Lung      | P1: Lin <sup>-</sup> CD45 <sup>+</sup> CD127 <sup>+</sup> CD161 <sup>+</sup> CD34 <sup>-</sup> (helper ILC, 75%) | 1                           |
|        |        |        | Intestine | P2: Lin <sup>-</sup> CD45 <sup>+</sup> CD127 <sup>-</sup> CD161 <sup>+</sup> CD34 <sup>-</sup> (5%)              | 2                           |
|        |        |        | Liver     | P3: Lin <sup>-</sup> CD45 <sup>+</sup> CD34 <sup>+</sup> CD127 <sup>+</sup> (Lymphoid progenitor,10%)            | 3                           |
|        |        |        | Skin      | P4: Lin <sup>-</sup> CD45 <sup>+</sup> CD34 <sup>+</sup> CD127 <sup>-</sup> (Other HSPC, 5%)                     | 4                           |
|        |        |        | Spleen    | P5: Lin <sup>-</sup> CD45 <sup>+</sup> CD127 <sup>-</sup> CD34 <sup>-</sup> (Other lin, 5%)                      | 5                           |
|        |        |        | Thymus    |                                                                                                                  | 6                           |
| F3     | 10 PCW | Female | Lung      | P1: Lin <sup>-</sup> CD45 <sup>+</sup> CD127 <sup>+</sup> CD161 <sup>+</sup> CD34 <sup>-</sup> (helper ILC, 75%) | 1                           |
|        |        |        | Intestine | P2: Lin <sup>-</sup> CD45 <sup>+</sup> CD127 <sup>-</sup> CD161 <sup>+</sup> CD34 <sup>-</sup> (5%)              | 2                           |
|        |        |        | Liver     | P3: Lin <sup>-</sup> CD45 <sup>+</sup> CD34 <sup>+</sup> CD127 <sup>+</sup> (Lymphoid progenitor,10%)            | 3                           |
|        |        |        | Skin      | P4: Lin <sup>-</sup> CD45 <sup>+</sup> CD34 <sup>+</sup> CD127 <sup>-</sup> (Other HSPC, 5%)                     | 4                           |
|        |        |        | Thymus    | P5: Lin <sup>-</sup> CD45 <sup>+</sup> CD127 <sup>-</sup> CD34 <sup>-</sup> (Other lin, 5%)                      | 6                           |
| F4     | 10 PCW | Male   | Lung      | P1: Lin <sup>-</sup> CD45 <sup>+</sup> CD127 <sup>+</sup> CD34 <sup>-</sup> (ILC, 70%)                           | 1                           |
|        |        |        | Intestine | P2: Lin <sup>-</sup> CD45 <sup>+</sup> CD34 <sup>+</sup> CD127 <sup>+</sup> (Lymphoid progenitor,10%)            | 2                           |
|        |        |        | Liver     | P3: Lin <sup>-</sup> CD45 <sup>+</sup> CD34 <sup>+</sup> CD127 <sup>-</sup> (Other HSPC, 10%)                    | 4                           |
|        |        |        | Skin      |                                                                                                                  | 5                           |
|        |        |        | Thymus    | P4: Lin <sup>-</sup> CD45 <sup>+</sup> CD127 <sup>-</sup> CD34 <sup>-</sup> (Other lin, 10%)                     | 6                           |
| F5     | 12 PCW | Male   | Lung      | P1: Lin <sup>-</sup> CD45 <sup>+</sup> CD127 <sup>+</sup> CD161 <sup>+</sup> CD34 <sup>-</sup> (helper ILC, 75%) | 1                           |
|        |        |        | Intestine | P2: Lin <sup>-</sup> CD45 <sup>+</sup> CD127 <sup>-</sup> CD161 <sup>+</sup> CD34 <sup>-</sup> (5%)              | 2                           |
|        |        |        | Liver     | P3: Lin <sup>-</sup> CD45 <sup>+</sup> CD34 <sup>+</sup> CD127 <sup>+</sup> (Lymphoid progenitor,10%)            | 3                           |
|        |        |        | Skin      | P4: Lin <sup>-</sup> CD45 <sup>+</sup> CD34 <sup>+</sup> CD127 <sup>-</sup> (Other HSPC, 5%)                     | 4                           |
|        |        |        | Spleen    |                                                                                                                  | 5                           |
|        |        |        | Thymus    | P5: Lin <sup>-</sup> CD45 <sup>+</sup> CD127 <sup>-</sup> CD34 <sup>-</sup> (Other lin, 5%)                      | 6                           |
| F6     | 12 PCW | Female | Lung      | P1: Lin <sup>-</sup> CD45 <sup>+</sup> CD127 <sup>+</sup> CD161 <sup>+</sup> CD34 <sup>-</sup> (helper ILC, 75%) | 1                           |
|        |        |        | Intestine | P2: Lin <sup>-</sup> CD45 <sup>+</sup> CD127 <sup>-</sup> CD161 <sup>+</sup> CD34 <sup>-</sup> (5%)              | 2                           |
|        |        |        | Liver     | P3: Lin <sup>-</sup> CD45 <sup>+</sup> CD34 <sup>+</sup> CD127 <sup>+</sup> (Lymphoid progenitor,10%)            | 3                           |
|        |        |        | Skin      | P4: Lin <sup>-</sup> CD45 <sup>+</sup> CD34 <sup>+</sup> CD127 <sup>-</sup> (Other HSPC, 5%)                     | 4                           |
|        |        |        | Spleen    |                                                                                                                  | 5                           |
|        |        |        | Thymus    | P5: Lin <sup>-</sup> CD45 <sup>+</sup> CD127 <sup>-</sup> CD34 <sup>-</sup> (Other lin, 5%)                      | 6                           |

**Supplementary Figure 1 (related to Figure 1) The summarized information of samples collected in this study, including the developmental stage, gender, tissue, sorting strategy and hashtag number.**

Human hematopoietic (liver), lymphoid (thymus; spleen) and non-lymphoid (intestine; skin; lung) tissues were collected from the fetal samples at indicated developmental stage, subjected to digestion and processed to single cell solution (described in Methods). Cells were labeled with hashtag oligos referring to different tissues of one sample and sorted based on the sorting strategy in Figure S1 for 10x Genomics sequencing.
