# Supplementary material for: Delineating spatiotemporal and hierarchical development of human fetal innate lymphoid cells
Source: PubMed Central journal article supplement (PMC8486758; doi:10.1038/s41422-021-00529-2), 2021-07-08
Supplement: 41422_2021_529_MOESM2_ESM.pdf [file 41422_2021_529_MOESM2_ESM.pdf]

Figure S2

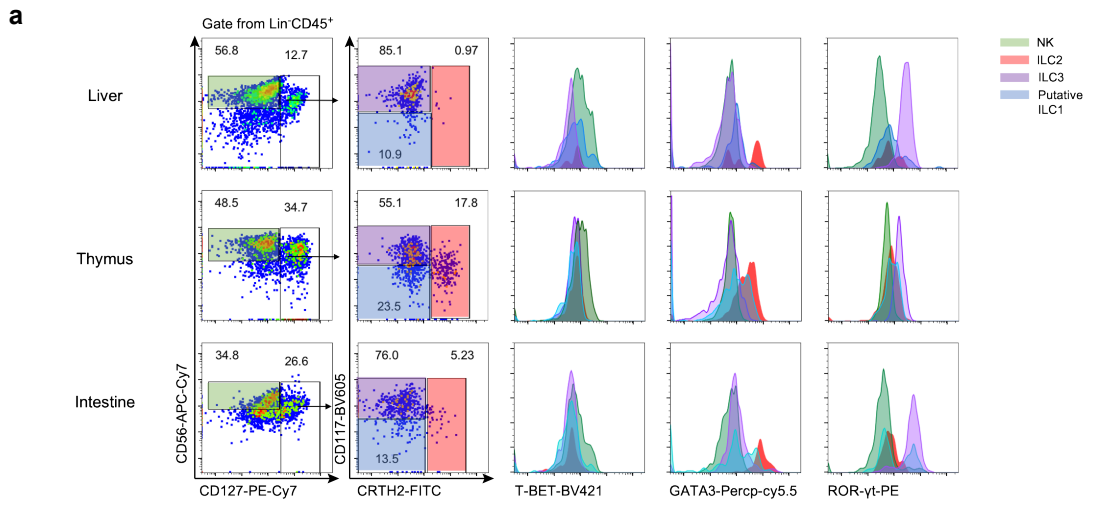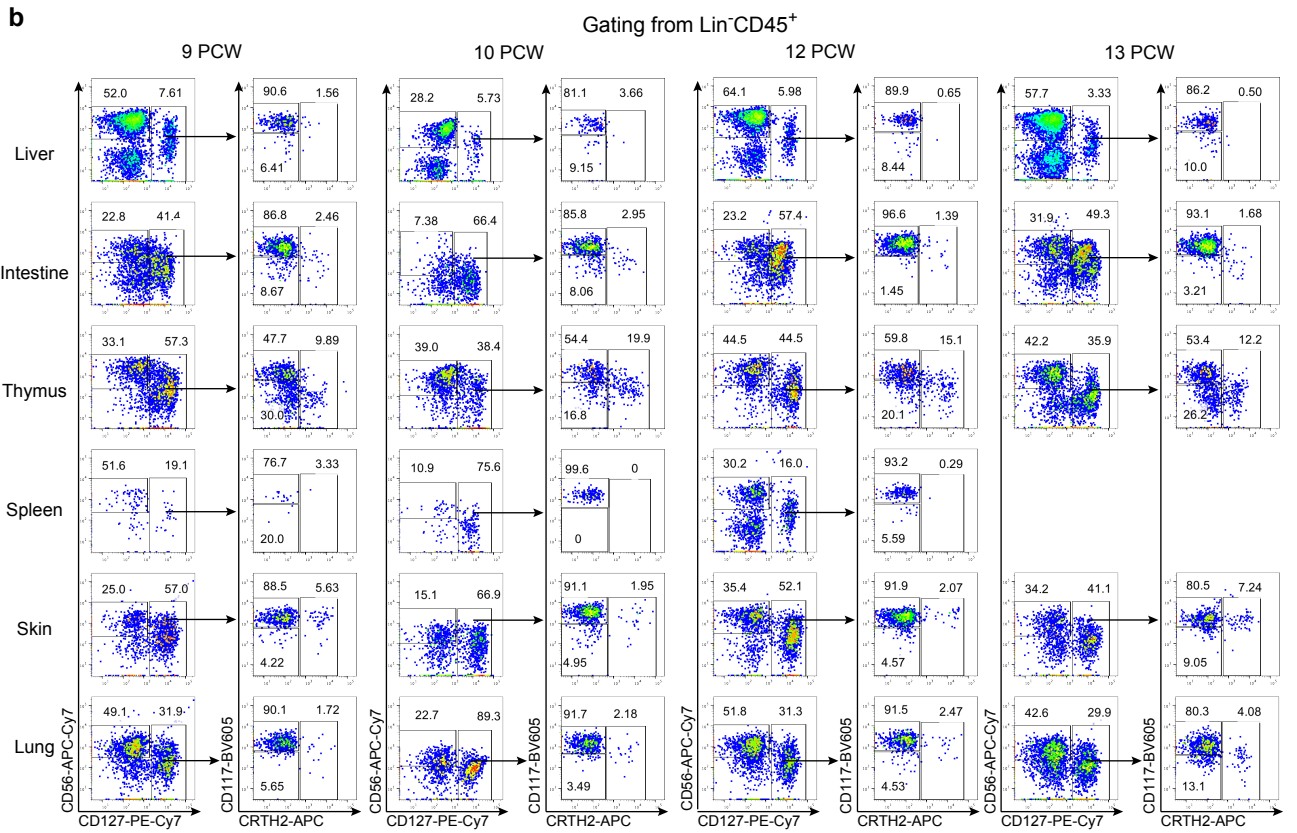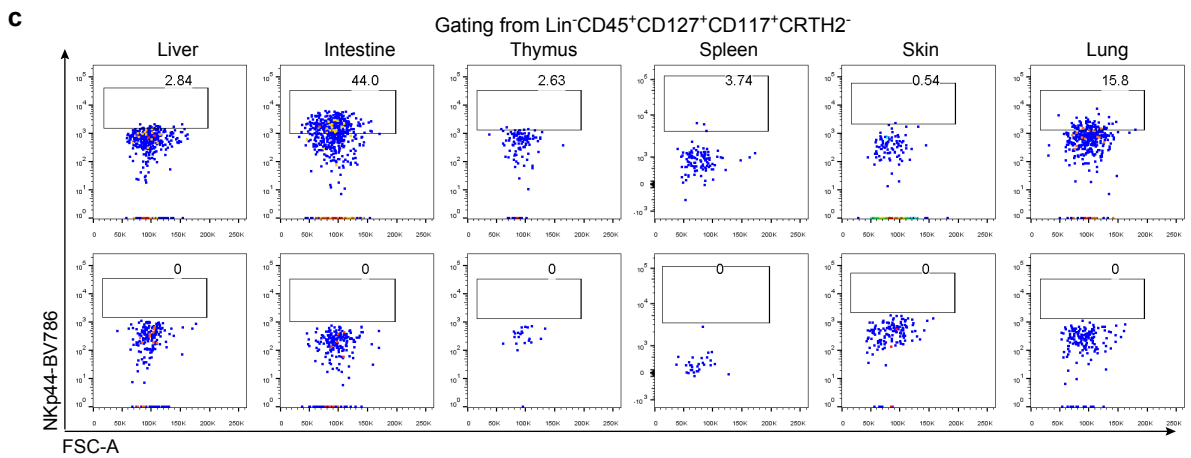

**Supplementary Figure 2 (related to Figure 1) The tissue distribution of mature ILCs in different tissues at different developmental stages is shown by flow cytometric analysis.**

**(a)** Expression of intracellular transcription factors (T-BET, GATA-3, and ROR $\gamma$ t) in NK, ILC2, ILC3 and putative ILC1 in different tissues.

**(b)** Representative flow cytometry results of killer ILCs and helper ILCs subpopulations in different tissues at each stage. **(c)**

Expression of NKp44 were detected in CRTH2<sup>-</sup>CD117<sup>+</sup> ILC3. Flow cytometric analysis of NKp44 protein level of CRTH2<sup>-</sup>CD117<sup>+</sup> ILC3 from each tissue (upper panel) and corresponding fluorescence minus one controls (below panel).
