# Supplementary material for: Delineating spatiotemporal and hierarchical development of human fetal innate lymphoid cells
Source: PubMed Central journal article supplement (PMC8486758; doi:10.1038/s41422-021-00529-2), 2021-07-08
Supplement: 41422_2021_529_MOESM3_ESM.pdf [file 41422_2021_529_MOESM3_ESM.pdf]

Figure S3

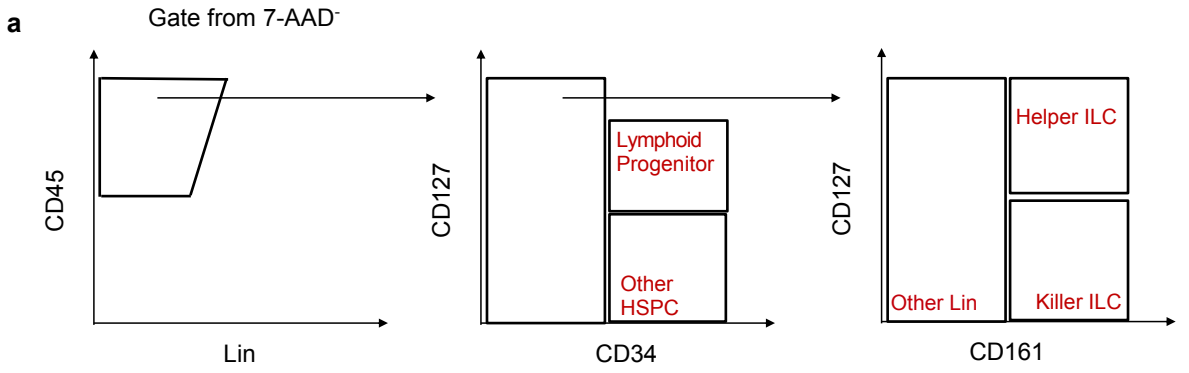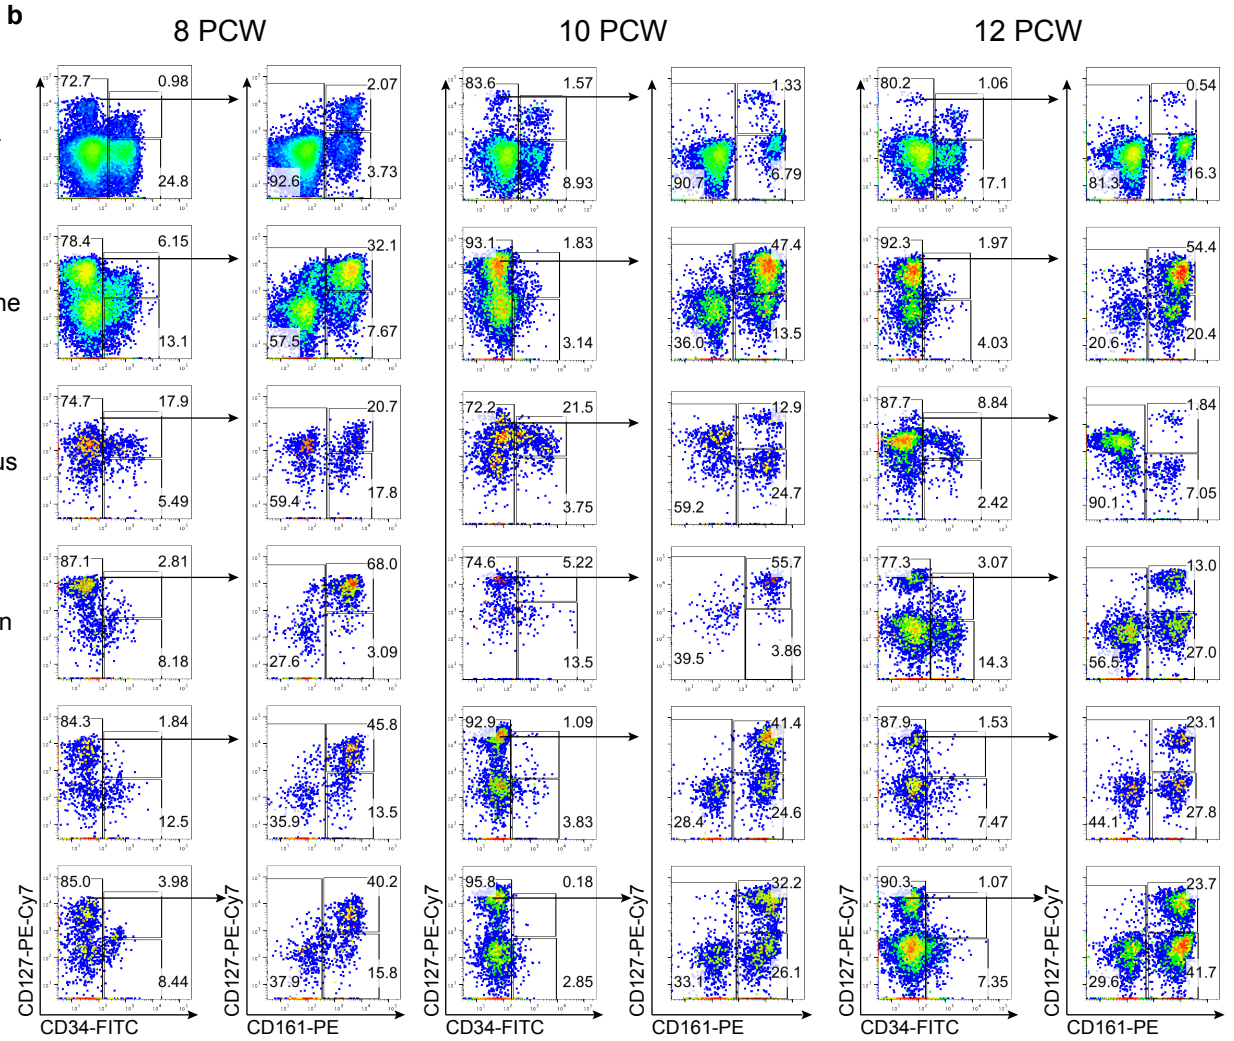

**Supplementary Figure 3 (related to Figure 1) Flow cytometric analysis of samples used for 10x genomics sequencing**

**(a)** Sorting strategy of human fetal ILC associated populations, which were all gated from 7-AAD<sup>-</sup>Lin<sup>-</sup>CD45<sup>+</sup>, CD34<sup>+</sup>CD127<sup>+</sup> lymphoid progenitors, CD34<sup>+</sup>CD127<sup>-</sup>HSPCs, CD34<sup>-</sup>CD161<sup>+</sup>CD127<sup>+/-</sup> ILCs and CD34<sup>-</sup>CD161<sup>-</sup> cells were sorted simultaneously and mixed at certain ratio described in Figure S1 from each tissue. **(b)** Representative flow cytometry plots show frequencies of five cell populations above from an individual sample at each stage.
