# Supplementary material for: Delineating spatiotemporal and hierarchical development of human fetal innate lymphoid cells
Source: PubMed Central journal article supplement (PMC8486758; doi:10.1038/s41422-021-00529-2), 2021-07-08
Supplement: 41422_2021_529_MOESM5_ESM.pdf [file 41422_2021_529_MOESM5_ESM.pdf]

Figure S5

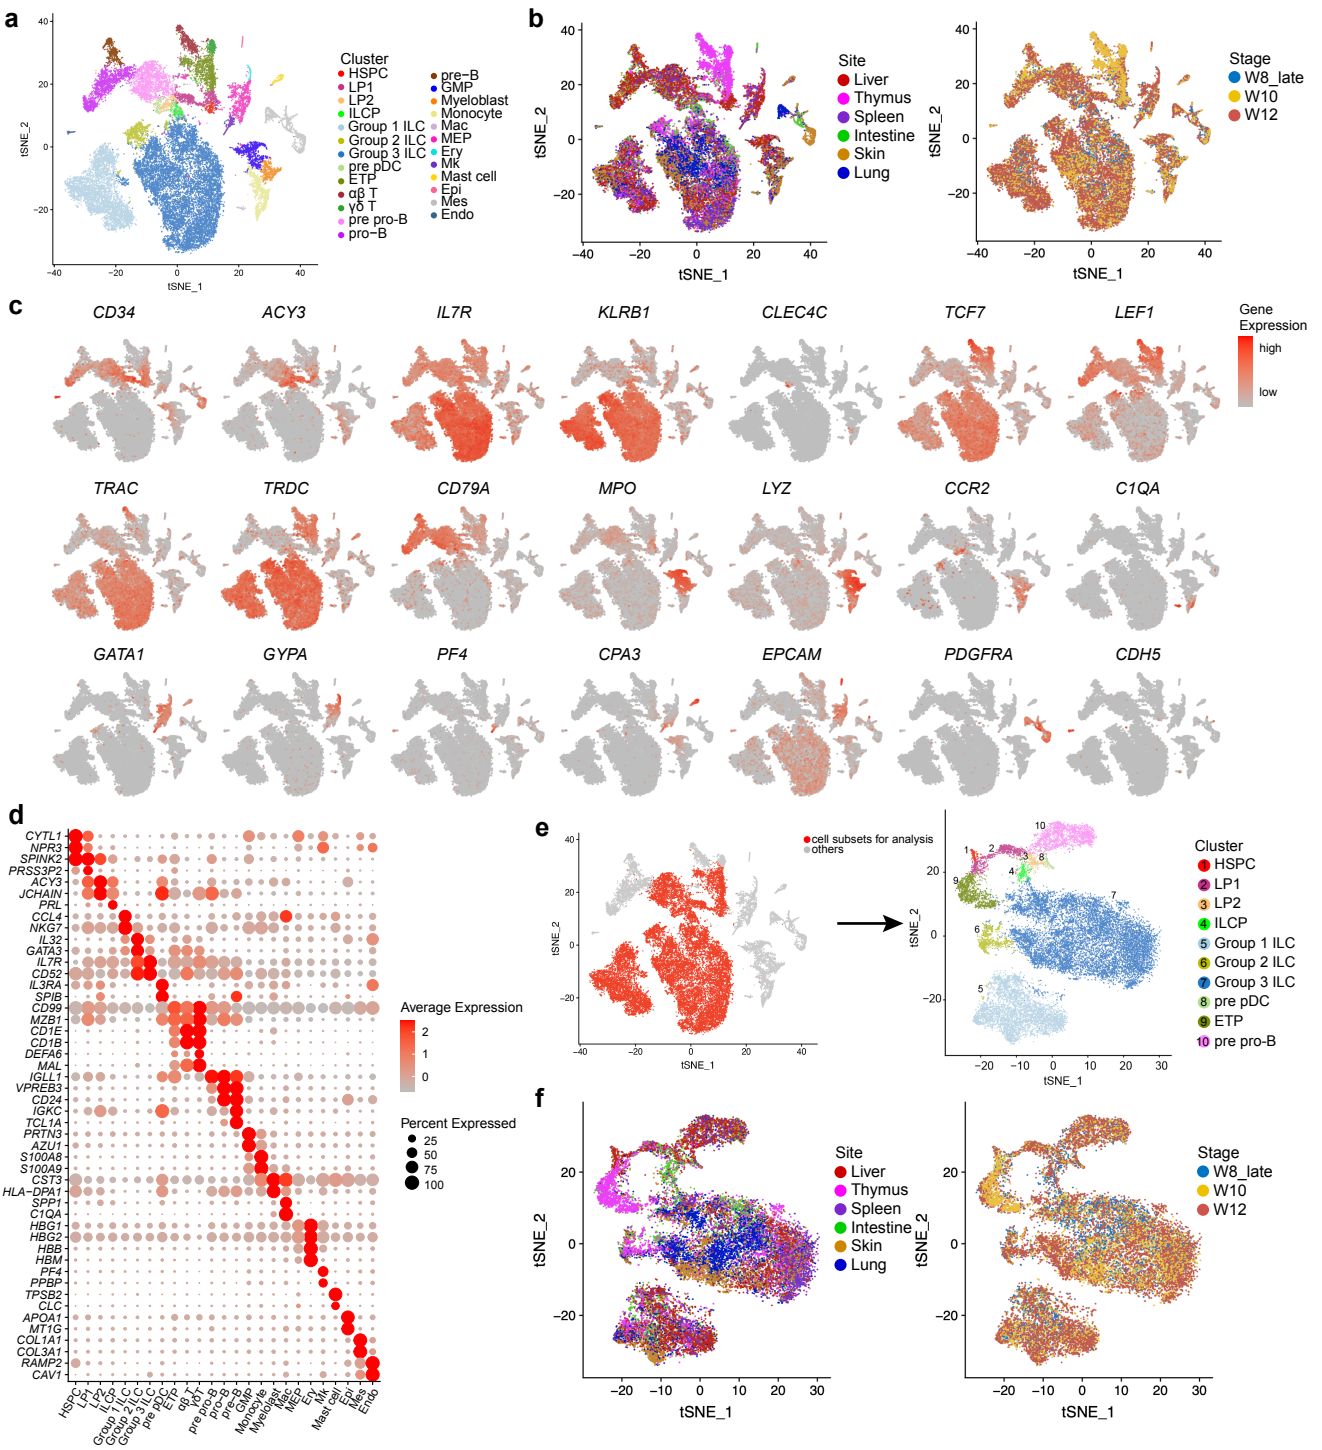

**Supplementary Figure 5 (related to Figure 2) Overview of all cell clusters identified and lymphoid-related cell clusters were used for further analysis**

**(a)** tSNE visualization of 25 cell clusters of combined data containing cells from human fetal hematopoietic (liver), lymphoid (thymus; spleen) and non-lymphoid (intestine; skin; lung) tissues of 6 samples colored by cell identity. **(b)** Site (left panel) and stage (right panel) information of cells are indicated by colors. **(c)** Expression of indicated featured genes projected onto tSNE. Colors indicate gene expression level. **(d)** Dot plots show the average expression level of top DEGs in each cluster. Colors represent the average expression and size encodes the proportion of gene-expressing cells. **(e)** 10 lymphoid-related cell clusters including HSPC, LP1, LP2, ILCP, Group 1 ILC, Group 2 ILC, Group 3 ILC, pre pDC, ETP, pre pro-B were used for further analysis. The highlighted color indicates lymphoid-related cell clusters used and the gray stands for others. **(f)** tSNE visualization of ten lymphoid-related cell clusters above, site (left panel) and stage (right panel) information indicated by colors.
