# Supplementary material for: Delineating spatiotemporal and hierarchical development of human fetal innate lymphoid cells
Source: PubMed Central journal article supplement (PMC8486758; doi:10.1038/s41422-021-00529-2), 2021-07-08
Supplement: 41422_2021_529_MOESM7_ESM.pdf [file 41422_2021_529_MOESM7_ESM.pdf]

Figure S7

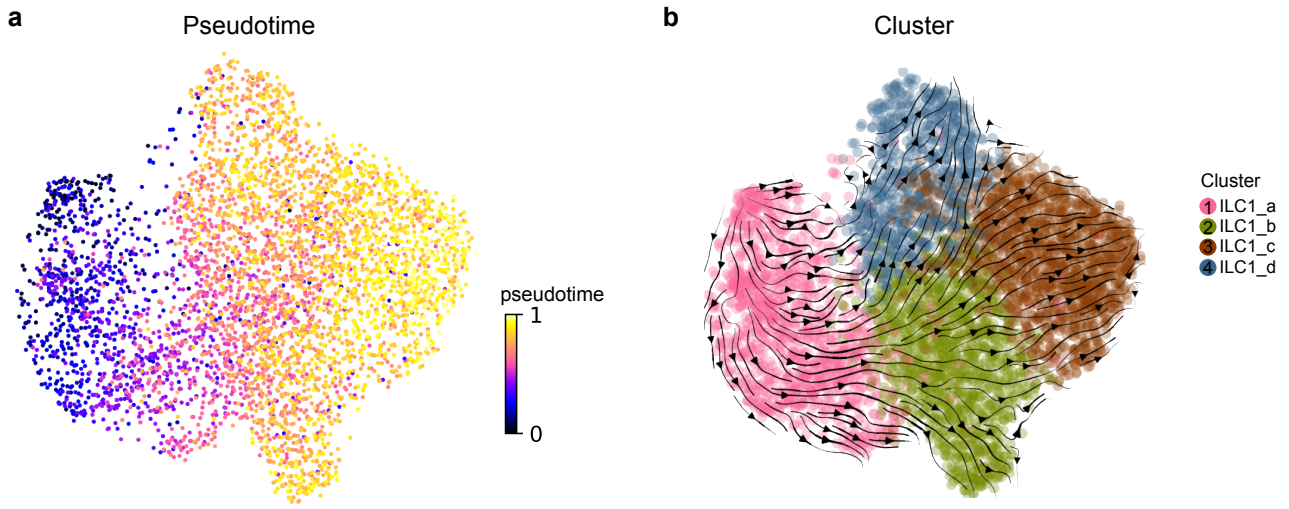

**Supplementary Figure 7 (related to Figure 4) Pseudotime analysis of ILC1 sub-clusters**

pseudotemporal ordering **(a)** and directed transition probabilities **(b)** were evaluated by Cellrank based on KNN graph and CytoTRACE score derived from gene expression data and projected onto umap embedding.
