# Supplementary material for: Delineating spatiotemporal and hierarchical development of human fetal innate lymphoid cells
Source: PubMed Central journal article supplement (PMC8486758; doi:10.1038/s41422-021-00529-2), 2021-07-08
Supplement: 41422_2021_529_MOESM9_ESM.pdf [file 41422_2021_529_MOESM9_ESM.pdf]

Figure S9

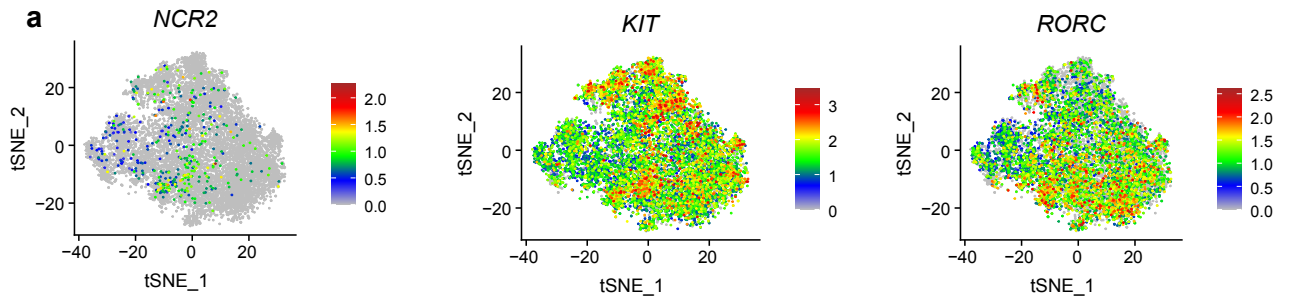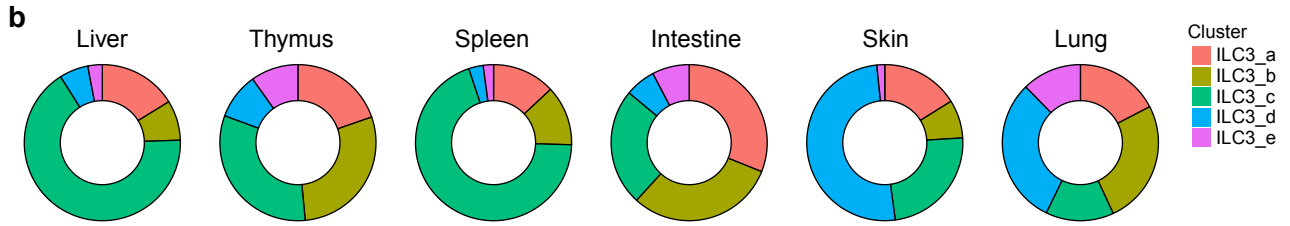

**Supplementary Figure 9 (related to Figure 6) Tissue distribution of ILC3 sub-clusters**

**(a)** Expression of indicated curated ILC3-related genes projected onto UMAP of ILC3. Colors indicate the expression levels. **(b)** Pie charts show tissue distribution of ILC3 sub-cluster. Colors indicate different cell populations.
